# Supplementary material for: Impact of stratospheric aerosol intervention geoengineering on surface air temperature in China: A surface energy budget perspective
Source: Copernicus journal article supplement (doi:10.5194/acp-2021-503), 2021-07-07
Supplement: Supplementary file 2 [file acp-2021-503-supplement.pdf]

*Supplement of*

**Impact of stratospheric aerosol intervention geoengineering on surface air temperature in China: A surface energy budget perspective**

Zhaochen Liu<sup>1,4</sup>, Xianmei Lang<sup>1,2,3</sup>, and Dabang Jiang<sup>1,3,4\*</sup>

<sup>1</sup>Institute of Atmospheric Physics, Chinese Academy of Sciences, Beijing 100029, China

<sup>2</sup>Collaborative Innovation Center on Forecast and Evaluation of Meteorological Disasters, Nanjing University of Information Science and Technology, Nanjing 210044, China

<sup>3</sup>CAS Center for Excellence in Tibetan Plateau Earth Sciences, Beijing 100101, China

<sup>4</sup>College of Earth and Planetary Sciences, University of Chinese Academy of Sciences, Beijing 100049, China

*Correspondence to:* Dabang Jiang (jiangdb@mail.iap.ac.cn)

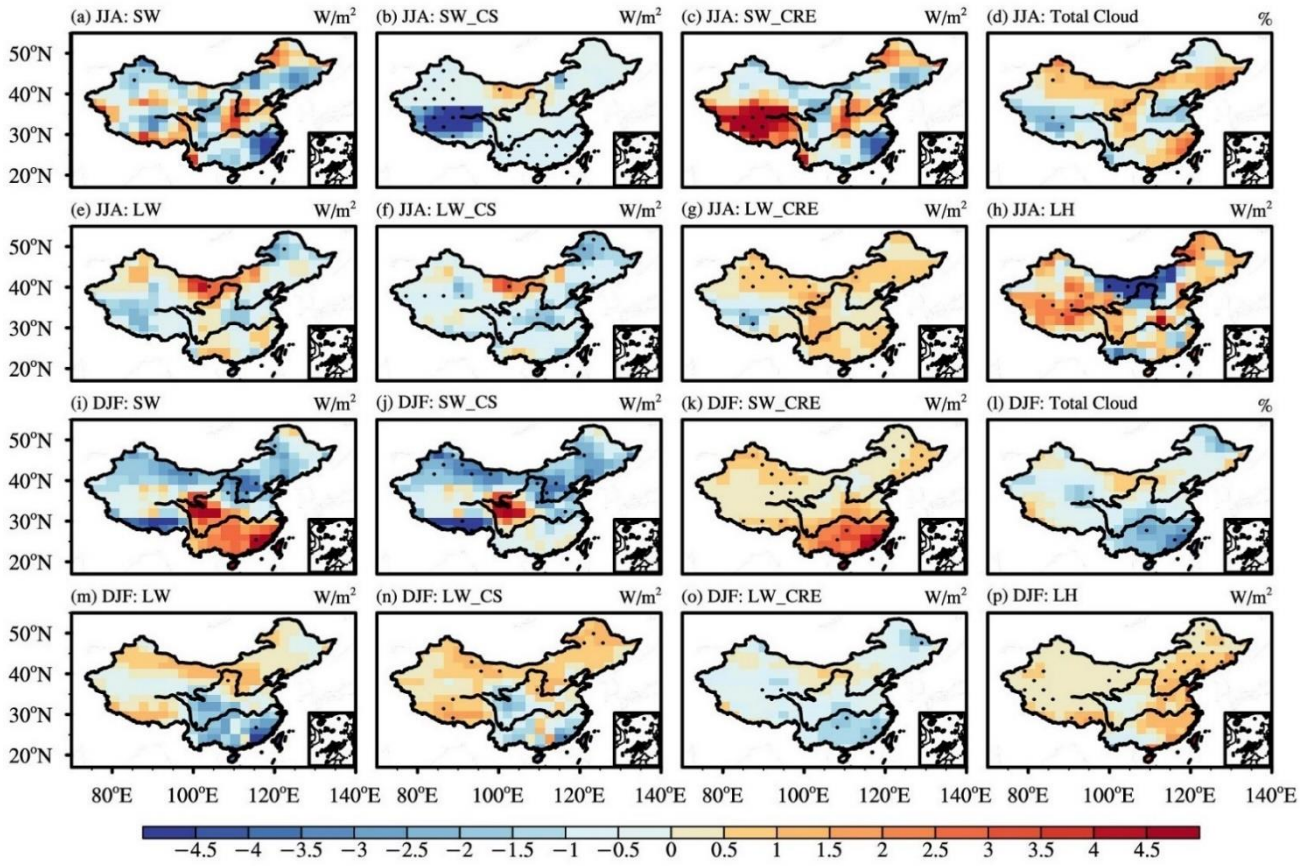

**Figure S1.** Same as Figure 7, but for MIROC-ESM.

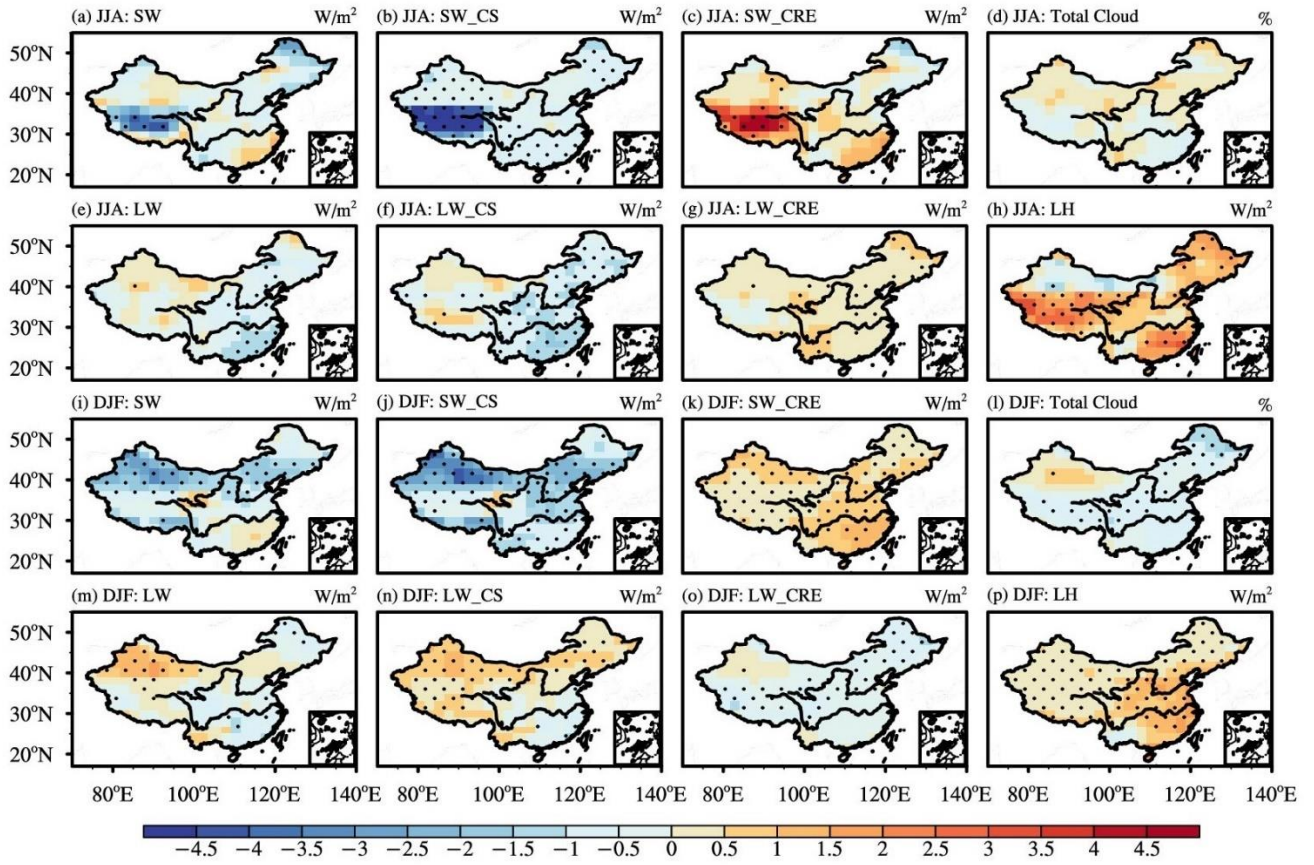

**Figure S2.** Same as Figure 7, but for MIROC-ESM-CHEM.

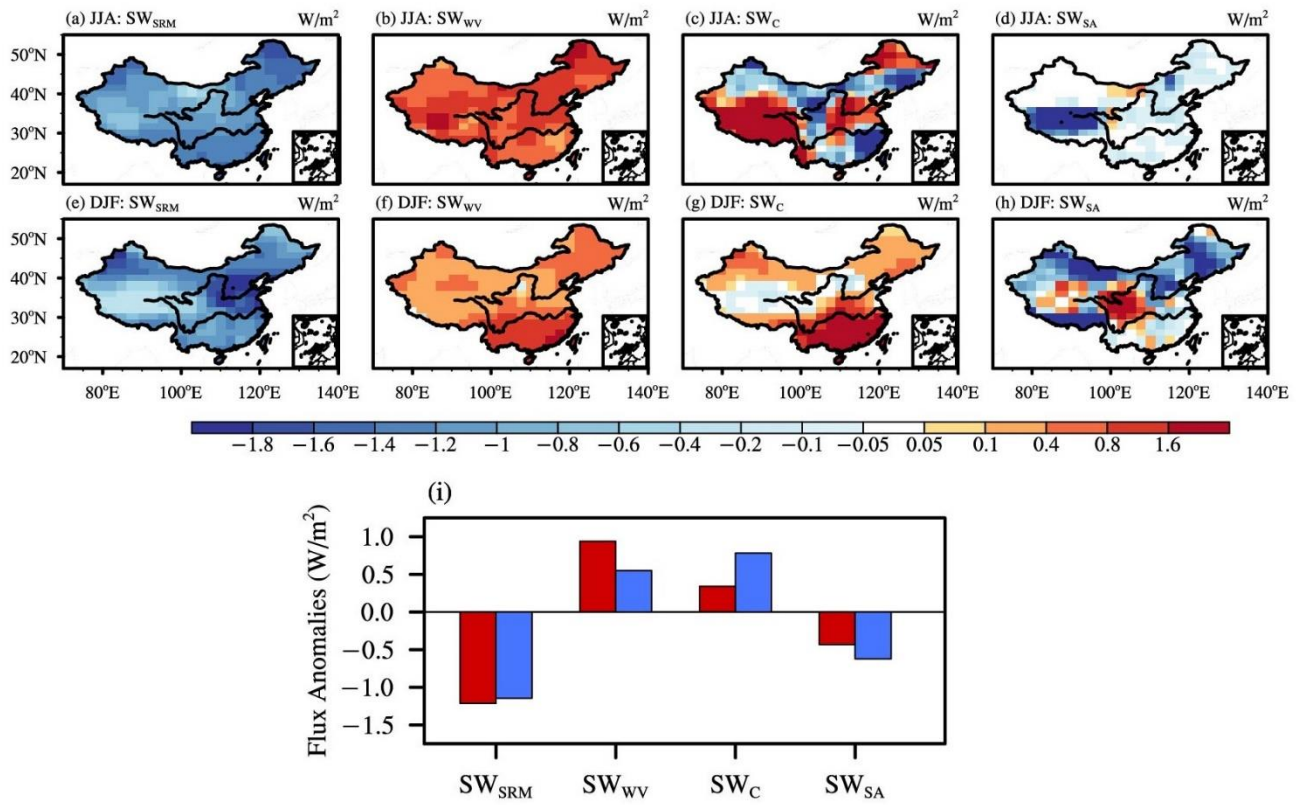

Figure S3. Same as Figure 8, but for MIROC-ESM.

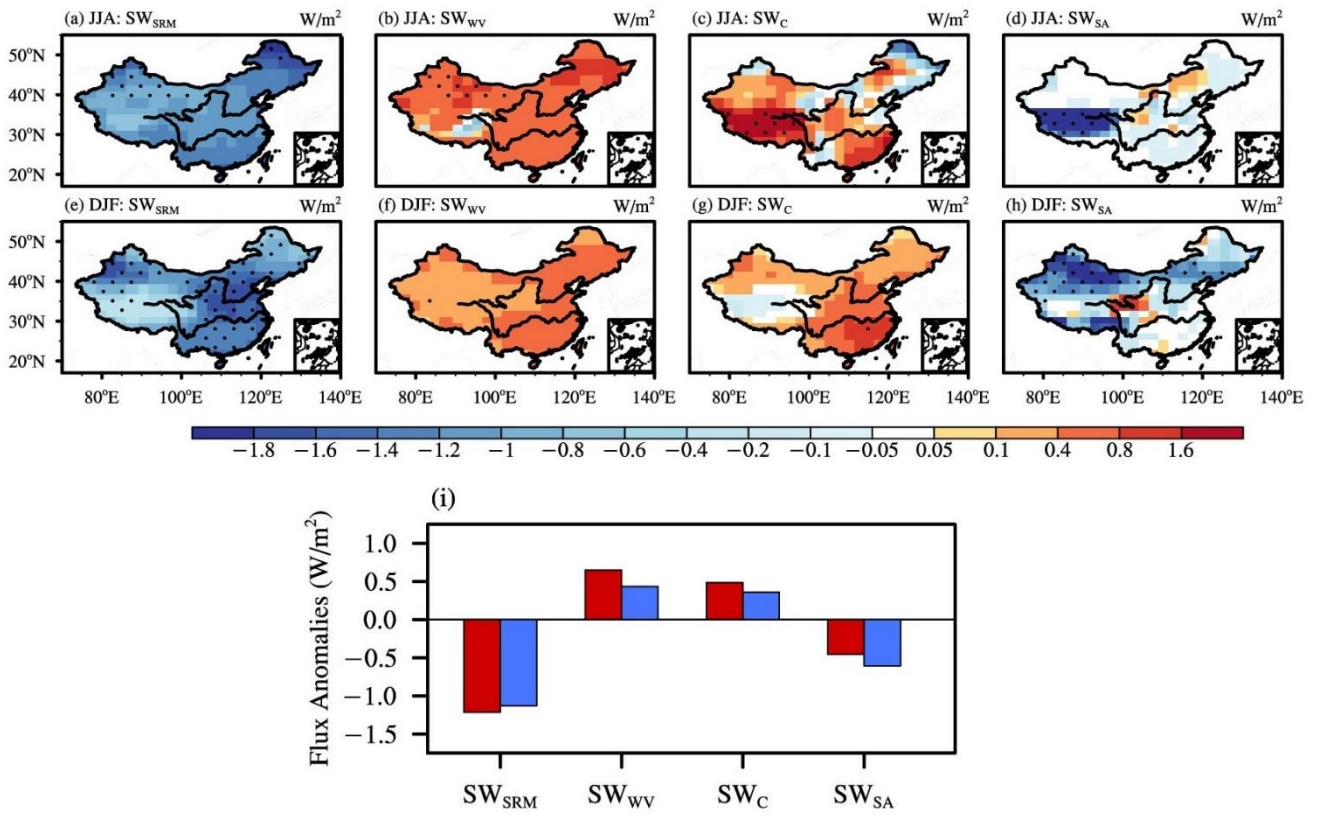

Figure S4. Same as Figure 8, but for MIROC-ESM-CHEM.



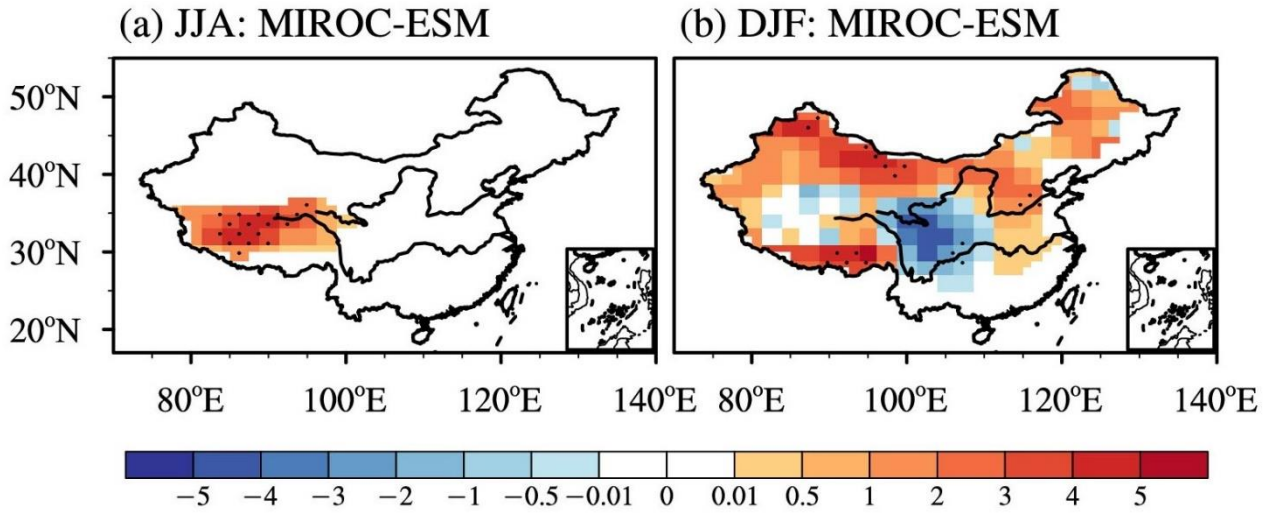

**Figure S5.** Spatial patterns of snow cover fraction differences (units: %) between G4 and RCP4.5 over China during the period of 2030–2069 in boreal (a) summer (JJA) and (b) winter (DJF) for MIROC-ESM. Stippling indicates areas statistically significant at the 90% confidence level.
